# Supplementary material for: Association of bleb formation with peri-aneurysmal contact in unruptured intracranial aneurysms
Source: PubMed Central journal article supplement (PMC9005541; doi:10.1038/s41598-022-10064-8), 2022-04-12
Supplement: 41598_2022_10064_MOESM1_ESM.pdf [file 41598_2022_10064_MOESM1_ESM.pdf]

**Supplemental raw data of TABLE 1.**

Aneurysmal shapes and hemodynamic features of three groups.

Group-A; Bleb (Yes), Contact (Yes), Group-B; Bleb (No), Contact (Yes), Group-C; Bleb (No), Contact (No).

| Group         | No | Bleb | Contact | Age/Sex           | Location of | Width     | Depth     | Aspect    | Surface            | Volume             | WSS-p     | WSS-d     | NWSS      |
|---------------|----|------|---------|-------------------|-------------|-----------|-----------|-----------|--------------------|--------------------|-----------|-----------|-----------|
|               |    |      |         |                   | Aneurysms   | (mm)      | (mm)      | Ratio     | (mm <sup>2</sup> ) | (mm <sup>3</sup> ) |           |           |           |
| A             | 1  | Yes  | Yes     | 68/F              | Rt ICPC     | 7.02      | 2.91      | 0.42      | 67.53              | 66.84              | 5.20      | 0.60      | 0.12      |
|               | 2  | Yes  | Yes     | 63/F              | AComA       | 6.11      | 5.11      | 0.84      | 112.74             | 146.99             | 2.70      | 1.12      | 0.41      |
|               | 3  | Yes  | Yes     | 72/F              | AComA       | 4.97      | 3.13      | 0.63      | 48.95              | 42.01              | 2.68      | 1.54      | 0.57      |
|               | 4  | Yes  | Yes     | 58/M              | AComA       | 6.55      | 9.09      | 1.39      | 222.15             | 285.83             | 6.89      | 1.70      | 0.25      |
|               | 5  | Yes  | Yes     | 75/F              | Rt ICPC     | 8.38      | 7.43      | 0.89      | 200.31             | 305.37             | 2.81      | 1.07      | 0.38      |
|               | 6  | Yes  | Yes     | 49/F              | Rt ICPC     | 2.61      | 1.21      | 0.46      | 9.91               | 4.29               | 3.07      | 2.81      | 0.92      |
|               | 7  | Yes  | Yes     | 58/M              | Lt ICPC     | 3.25      | 1.84      | 0.56      | 21.25              | 11.86              | 2.52      | 1.80      | 0.71      |
|               | 8  | Yes  | Yes     | 74/F              | AComA       | 4.88      | 5.73      | 1.17      | 88.14              | 86.87              | 2.38      | 0.98      | 0.41      |
|               | 9  | Yes  | Yes     | 68/F              | Lt MCA      | 4.01      | 5.84      | 1.46      | 102.13             | 107.58             | 2.34      | 0.26      | 0.11      |
|               | 10 | Yes  | Yes     | 66/M              | Rt ICPC     | 5.65      | 9.90      | 1.75      | 270.13             | 439.66             | 1.39      | 0.45      | 0.32      |
|               | 11 | Yes  | Yes     | 75/F              | AComA       | 4.44      | 2.98      | 0.66      | 41.92              | 35.52              | 1.94      | 1.58      | 0.81      |
|               | 12 | Yes  | Yes     | 50/M              | AComA       | 6.52      | 4.68      | 0.72      | 122.28             | 151.86             | 2.66      | 0.98      | 0.37      |
|               | 13 | Yes  | Yes     | 61/F              | AComA       | 6.24      | 4.91      | 0.79      | 184.03             | 243.38             | 3.18      | 1.34      | 0.42      |
|               | 14 | Yes  | Yes     | 70/F              | BA-tip      | 9.36      | 4.36      | 0.47      | 163.78             | 250.87             | 3.27      | 1.12      | 0.34      |
| <b>Ave±SD</b> |    | -    | -       | <b>64.79±8.65</b> | -           | 5.71±1.87 | 4.94±2.55 | 0.87±0.42 | 118.23±79.69       | 155.64±130.89      | 3.07±1.39 | 1.24±0.64 | 0.44±0.24 |
| <b>Mdn</b>    |    | -    | -       | <b>67.00</b>      | -           | 5.88      | 5.88      | 0.75      | 107.43             | 127.29             | 2.69      | 1.12      | 0.40      |

|          |       |        |     |                    |                    |           |           |           |              |              |             |           |           |
|----------|-------|--------|-----|--------------------|--------------------|-----------|-----------|-----------|--------------|--------------|-------------|-----------|-----------|
|          | 99%CI | -      | -   | <b>58.83-70.74</b> | -                  | 4.43-7.00 | 3.18-6.69 | 0.59-1.16 | 63.37-173.09 | 65.53-245.75 | 2.12-4.03   | 0.80-1.68 | 0.27-0.60 |
| <b>B</b> | 15    | No     | Yes | 77/F               | AComA              | 4.20      | 3.00      | 0.70      | 45.20        | 36.30        | 2.86        | 1.02      | 0.36      |
|          | 16    | No     | Yes | 53/M               | AComA              | 3.70      | 2.70      | 0.40      | 32.60        | 22.20        | 3.30        | 2.10      | 0.64      |
|          | 17    | No     | Yes | 39/F               | Rt AChor           | 3.20      | 1.20      | 0.40      | 12.60        | 5.90         | 3.20        | 2.60      | 0.81      |
|          | 18    | No     | Yes | 49/F               | Rt MCA             | 4.30      | 2.80      | 0.70      | 41.93        | 32..6        | 2.60        | 1.70      | 0.65      |
|          | 19    | No     | Yes | 67/F               | Rt MCA             | 3.50      | 3.40      | 1.00      | 35.65        | 25.70        | 3.20        | 2.00      | 0.63      |
|          | 20    | No     | Yes | 78/F               | Rt MCA             | 2.90      | 3.10      | 1.10      | 37.77        | 25.60        | 11.70       | 9.70      | 0.83      |
|          | 21    | No     | Yes | 63/M               | Rt MCA             | 6.30      | 2.60      | 0.40      | 50.10        | 48.60        | 4.50        | 3.40      | 0.76      |
|          | 22    | No     | Yes | 73/F               | Rt MCA             | 3.30      | 1.20      | 0.40      | 13.53        | 7.30         | 8.80        | 3.90      | 0.44      |
|          | 23    | No     | Yes | 78/F               | Lt MCA             | 4.01      | 5.84      | 1.46      | 102.13       | 107.58       | 2.30        | 0.30      | 0.13      |
|          | 24    | No     | Yes | 67/F               | Lt MCA             | 4.50      | 2.70      | 0.60      | 43.20        | 42.30        | 13.50       | 10.40     | 0.77      |
|          | 25    | No     | Yes | 60/M               | Lt MCA             | 4.00      | 2.10      | 0.50      | 24.20        | 16.00        | 1.30        | 0.70      | 0.54      |
|          | 26    | No     | Yes | 48/F               | Lt MCA             | 3.50      | 2.20      | 0.60      | 24.89        | 15.80        | 2.00        | 0.60      | 0.30      |
|          | 27    | No     | Yes | 67/F               | Lt MCA             | 4.40      | 4.00      | 0.90      | 64.06        | 57.70        | 12.80       | 6.20      | 0.48      |
|          |       | Ave±SD | -   | -                  | <b>63.00±12.58</b> | -         | 3.99±0.85 | 2.83±1.20 | 0.70±0.33    | 40.60±23.43  | 34.25±28.12 | 5.54±4.46 | 3.43±3.35 |
|          | Mdn   | -      | -   | <b>67.00</b>       | -                  | 4.00      | 2.70      | 0.60      | 37.77        | 25.65        | 3.20        | 2.10      | 0.63      |
|          | 99%CI | -      | -   | <b>54.01-71.99</b> | -                  | 3.38-4.60 | 1.98-3.69 | 0.47-0.94 | 23.87-57.34  | 14.16-54.34  | 2.36-8.73   | 1.04-5.82 | 0.41-0.72 |
|          | 28    | No     | No  | 77/M               | AComA              | 3.60      | 1.40      | 0.40      | 15.80        | 9.30         | 7.00        | 7.50      | 1.07      |
|          | 29    | No     | No  | 53/M               | AComA              | 4.00      | 1.60      | 0.40      | 20.20        | 11.60        | 2.00        | 2.30      | 1.15      |
|          | 30    | No     | No  | 66/M               | AComA              | 4.80      | 1.70      | 0.40      | 26.40        | 17.40        | 1.80        | 2.90      | 1.61      |
|          | 31    | No     | No  | 71/F               | AComA              | 2.30      | 1.00      | 0.40      | 7.23         | 3.10         | 11.60       | 10.30     | 0.89      |
|          | 32    | No     | No  | 47/M               | AComA              | 2.20      | 0.40      | 0.20      | 4.21         | 2.00         | 3.80        | 5.40      | 1.42      |
|          | 33    | No     | No  | 65/F               | AComA              | 2.90      | 0.90      | 0.30      | 8.80         | 3.40         | 7.10        | 17.70     | 2.49      |

|         |        |    |             |             |           |             |             |             |              |             |           |            |           |
|---------|--------|----|-------------|-------------|-----------|-------------|-------------|-------------|--------------|-------------|-----------|------------|-----------|
| C       | 34     | No | No          | 73/F        | Lt AChor  | 2.80        | 0.80        | 0.30        | 7.90         | 3.10        | 7.90      | 19.40      | 2.46      |
|         | 35     | No | No          | 67/F        | Rt MCA    | 3.40        | 2.20        | 0.70        | 25.20        | 16.60       | 10.30     | 9.40       | 0.91      |
|         | 36     | No | No          | 61/F        | Rt MCA    | 4.10        | 1.60        | 0.40        | 21.17        | 12.80       | 2.60      | 4.10       | 1.58      |
|         | 37     | No | No          | 61/F        | Rt MCA    | 2.60        | 1.00        | 0.40        | 8.21         | 4.30        | 5.90      | 7.70       | 1.31      |
|         | 38     | No | No          | 74/F        | Rt MCA    | 3.70        | 0.70        | 0.20        | 13.62        | 6.17        | 1.70      | 2.04       | 1.20      |
|         | 39     | No | No          | 68/F        | Lt MCA    | 3.20        | 2.30        | 0.70        | 23.50        | 15.30       | 3.70      | 6.90       | 1.86      |
|         | 40     | No | No          | 72/M        | Lt MCA    | 3.30        | 1.20        | 0.40        | 13.00        | 9.10        | 7.70      | 9.00       | 1.17      |
|         | 41     | No | No          | 71/F        | Lt MCA    | 2.70        | 1.00        | 0.40        | 8.74         | 5.10        | 6.30      | 12.50      | 1.98      |
|         | 42     | No | No          | 74/F        | Lt MCA    | 3.30        | 1.80        | 0.60        | 17.80        | 10.40       | 2.20      | 1.00       | 0.45      |
|         | 43     | No | No          | 72/F        | BA-tip    | 5.00        | 1.60        | 0.30        | 28.07        | 18.60       | 1.90      | 1.60       | 0.84      |
|         | 44     | No | No          | 60/F        | BA-tip    | 42.00       | 64.00       | 1.52        | 63.72        | 57.18       | 3.10      | 0.80       | 0.26      |
|         | 45     | No | No          | 70/M        | BA-tip    | 3.70        | 2.40        | 0.60        | 24.31        | 15.60       | 1.30      | 1.80       | 1.38      |
|         | Ave±SD | -  | -           | 66.78±7.85  | -         | 5.53±9.13   | 4.87±14.77  | 0.48±0.30   | 18.77±13.53  | 12.28±12.48 | 4.88±3.18 | 6.80±5.55  | 1.34±0.60 |
|         | Mdn    | -  | -           | 69.00       | -         | 3.35        | 1.50        | 0.40        | 16.80        | 9.85        | 3.75      | 6.15       | 1.25      |
|         | 99%CI  | -  | -           | 62.01-71.54 | -         | -0.01-11.08 | -4.10-13.83 | 0.30-0.66   | 10.56-26.99  | 4.70-19.86  | 2.95-6.81 | 3.43-10.17 | 0.97-1.70 |
| Overall |        |    |             |             |           |             |             |             |              |             |           |            |           |
| Ave±SD  | -      | -  | 65.07±9.57  | -           | 5.14±5.83 | 4.30±9.35   | 0.67±0.38   | 56.02±62.98 | 63.19±96.69  | 4.51±3.31   | 4.10±4.56 | 0.83±0.59  |           |
| Mdn     | -      | -  | 67.00       | -           | 4.00      | 2.40        | 0.60        | 28.07       | 18.60        | 3.10        | 2.00      | 0.71       |           |
| 99%CI   | -      | -  | 61.39-68.74 | -           | 2.90-7.38 | 0.71-7.89   | 0.52-0.81   | 31.84-80.20 | 26.06-100.32 | 3.24-5.78   | 2.34-5.85 | 0.61-1.06  |           |

AChorA=anterior choroidal artery; AComA= anterior communicating artery;

Ave=mean; BA-tip=the tip of the basilar artery; CI=confidence interval; IC-PC=internal carotid-posterior communicating artery; Lt= left; MCA=middle cerebral artery;

Mdn=median; NWSS=normalized wall shear stress; Rt= right; SD=standard deviation;  
WSS= wall shear stress; WSS-p=WSS at parent artery; WSS-d=WSS at aneurysmal  
dome; All data=mean  $\pm$  standard deviation.
